# Supplementary material
Source: PubMed Central journal article supplement (PMC5744694)
Supplement: EHP943.s001.acco.pdf [file EHP943.s001.acco.pdf]

**Note to readers with disabilities:** *EHP* strives to ensure that all journal content is accessible to all readers. However, some figures and Supplemental Material published in *EHP* articles may not conform to [508 standards](#) due to the complexity of the information being presented. If you need assistance accessing journal content, please contact [ehponline@niehs.nih.gov](mailto:ehponline@niehs.nih.gov). Our staff will work with you to assess and meet your accessibility needs within 3 working days.

## **Supplemental Material**

### **Serum Vitamin D and Risk of Breast Cancer within Five Years**

Katie M. O'Brien, Dale P. Sandler, Jack A. Taylor, and Clarice R. Weinberg

#### **Table of Contents**

**Figure 1.** A restricted cubic spline modeling hazard ratios for the association between total 25(OH)D and breast cancer within 5 years, relative to the breast cancer hazard at 20 ng/mL. The dashed lines indicate 95% confidence intervals. Knots were placed at the 5<sup>th</sup>, 35<sup>th</sup>, 65<sup>th</sup>, and 95<sup>th</sup> percentiles.

**Table 1.** Time since blood draw, 25(OH)D and breast cancer in the Sister Study.

**Table 2.** Hazard ratios (HR) and 95% confidence intervals (CI) for the association between vitamin-D related exposures and breast cancer within 5 years (370 premenopausal cases, 1,329 post-menopausal cases, 49,044 non-cases)

**Table 3.** Means (standard deviation) of measured total 25(OH)D by covariates of interest in all sub-cohort members (n= 1,843).

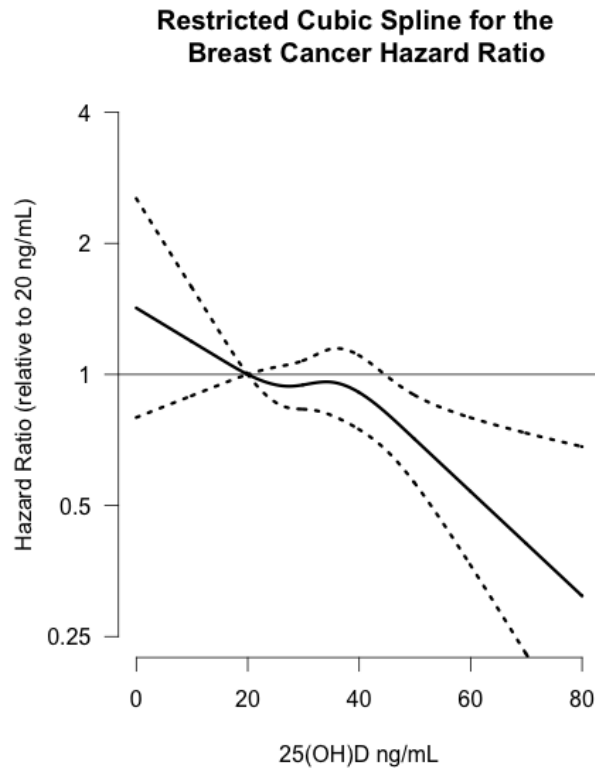

**Figure 1:** A restricted cubic spline modeling hazard ratios for the association between total 25(OH)D and breast cancer within 5 years, relative to the breast cancer hazard at 20 ng/mL. The dashed lines indicate 95% confidence intervals. Knots were placed at the 5<sup>th</sup>, 35<sup>th</sup>, 65<sup>th</sup>, and 95<sup>th</sup> percentiles.

**Table 1. Time since blood draw, 25(OH)D and breast cancer in the Sister Study.**

| Description of Analysis                   | Sample Size <sup>a</sup> |            | Categories of 25(OH)D (in ng/mL)      | Hazard Ratio (95% Confidence Interval) |
|-------------------------------------------|--------------------------|------------|---------------------------------------|----------------------------------------|
|                                           | Cases                    | Sub-cohort |                                       |                                        |
| Exclude first two years of follow-up time | 1003                     | 1770       | 1 <sup>st</sup> Quartile (0-24.6)     | 1.00                                   |
|                                           |                          |            | 2 <sup>nd</sup> Quartile (>24.6-31.4) | 1.08 (0.86-1.36)                       |
|                                           |                          |            | 3 <sup>rd</sup> Quartile (>31.6-38.0) | 1.00 (0.79-1.26)                       |
|                                           |                          |            | 4 <sup>th</sup> Quartile (>38.0)      | 0.77 (0.60-0.99)                       |
| Exclude last two years of follow-up time  | 977                      | 1822       | 1 <sup>st</sup> Quartile (0-24.6)     | 1.00                                   |
|                                           |                          |            | 2 <sup>nd</sup> Quartile (>24.6-31.4) | 1.05 (0.84-1.31)                       |
|                                           |                          |            | 3 <sup>rd</sup> Quartile (>31.4-38.0) | 1.00 (0.79-1.26)                       |
|                                           |                          |            | 4 <sup>th</sup> Quartile (>38.0)      | 0.72 (0.56-0.93)                       |

All models are adjusted for batch, seasonal trends, race, education level, current hormonal birth control use, current hormone therapy type, menopausal status, physical activity, BMI, osteoporosis, parity, alcohol consumption, and a BMI by menopausal status interaction term.

<sup>a</sup>Sample size with complete covariate information.

**Table 2. Hazard ratios (HR) and 95% confidence intervals (CI) for the association between vitamin-D related exposures and breast cancer within 5 years (370 premenopausal cases, 1,329 post-menopausal cases, 49,044 non-cases)**

|                                                                                 | <b>Premenopausal<br/>HR (95% CI)</b> | <b>Post-menopausal<br/>HR (95% CI)</b> |
|---------------------------------------------------------------------------------|--------------------------------------|----------------------------------------|
| <b>Total vitamin D intake (supplement + diet)<sup>a</sup></b>                   |                                      |                                        |
| <200 IUs                                                                        | 1.00                                 | 1.00                                   |
| 200-399 IUs                                                                     | 1.10 (0.82, 1.47)                    | 0.97 (0.82, 1.15)                      |
| 400-599 IUs                                                                     | 1.28 (0.99, 1.67)                    | 0.91 (0.80, 1.05)                      |
| ≥600 IUs                                                                        | 1.20 (0.84, 1.70)                    | 0.83 (0.71, 0.98)                      |
| per 100 IUs                                                                     | 1.06 (1.01, 1.10) <sup>b</sup>       | 0.98 (0.96, 1.00) <sup>b</sup>         |
| <b>Regular vitamin D supplementation<sup>c,d</sup></b>                          |                                      |                                        |
| No                                                                              | 1.00                                 | 1.00                                   |
| Yes                                                                             | 1.13 (0.92, 1.39) <sup>b</sup>       | 0.83 (0.74, 0.93) <sup>b</sup>         |
| <b>Hours per week doing any sports/exercise (including walking)<sup>e</sup></b> |                                      |                                        |
| 0-2 hours/week                                                                  | 1.00                                 | 1.00                                   |
| >2-5 hours/week                                                                 | 0.88 (0.59, 1.32)                    | 0.87 (0.70, 1.07)                      |
| >5-10 hours/week                                                                | 0.95 (0.66, 1.37)                    | 0.92 (0.76, 1.12)                      |
| >10 hours/week                                                                  | 0.93 (0.64, 1.35)                    | 0.89 (0.73, 1.08)                      |
| per hour/week                                                                   | 1.00 (0.98, 1.02)                    | 1.00 (0.99, 1.01)                      |
| <b>Latitude, current residence<sup>f</sup></b>                                  |                                      |                                        |
| ≤34°                                                                            | 1.00                                 | 1.00                                   |
| 35-39°                                                                          | 0.99 (0.73, 1.35)                    | 1.07 (0.92, 1.24)                      |
| 40-42°                                                                          | 1.11 (0.83, 1.49)                    | 1.01 (0.87, 1.18)                      |
| >42°                                                                            | 1.30 (0.94, 1.81)                    | 0.99 (0.84, 1.18)                      |
| Per degree                                                                      | 1.02 (1.00, 1.04)                    | 1.00 (0.99, 1.01)                      |
| <b>Hours spent outdoors per year<sup>g</sup></b>                                |                                      |                                        |
| 0-320                                                                           | 1.00                                 | 1.00                                   |
| 321-530                                                                         | 1.05 (0.79, 1.39)                    | 1.01 (0.86, 1.17)                      |
| 531-850                                                                         | 0.98 (0.73, 1.30)                    | 0.93 (0.80, 1.08)                      |
| >850                                                                            | 0.94 (0.70, 1.27)                    | 0.93 (0.80, 1.08)                      |
| Per 200 hours/year                                                              | 1.00 (0.95, 1.05)                    | 0.99 (0.97, 1.01)                      |

All covariates in the table were assessed during the baseline interview, unless otherwise specified.

<sup>a</sup>Adjusted for age, race, education, physical activity, BMI, current birth control use, current hormone therapy type, current alcohol use, total energy intake, osteoporosis, and parity. Women with energy intake <400 or >4,000 were excluded from the analysis.

<sup>b</sup>P for heterogeneity by menopausal status <0.05

<sup>c</sup>Adjusted for age, race, education, physical activity, BMI, current birth control use, current hormone therapy type, current alcohol use, osteoporosis, and parity

<sup>d</sup>Women who took a multivitamin or separate vitamin D supplement at least 4 times per week were considered regular users.

<sup>e</sup>Adjusted for age, race, education, BMI, current birth control use, current hormone therapy type, current alcohol use, osteoporosis, and parity.

<sup>f</sup>Adjusted for age, race, education

<sup>g</sup>Adjusted for age, race, education, physical activity, hours walked per week, BMI, current birth control use, current hormone therapy type, current alcohol use, osteoporosis and parity.

**Table 3. Means (standard deviation) of measured total 25(OH)D by covariates of interest in all sub-cohort members (n= 1,843).**

|                                         | N (%)      | Season and batch-adjusted total 25(OH)D in ng/mL |
|-----------------------------------------|------------|--------------------------------------------------|
| <b>Overall</b>                          | 1843 (100) | 31.8 (10.5)                                      |
| <b>Age at blood draw</b>                |            |                                                  |
| 35-49                                   | 538 (29)   | 29.7 (10.6)                                      |
| 50-59                                   | 727 (39)   | 31.5 (10.3)                                      |
| 60-74                                   | 578 (31)   | 34.0 (10.3)                                      |
| <b>Season of blood draw<sup>a</sup></b> |            |                                                  |
| Spring (weeks 9-21)                     | 507 (28)   | 30.3 (10.9)                                      |
| Summer (weeks 22-34)                    | 530 (29)   | 34.1 (10.7)                                      |
| Fall (weeks 35-47)                      | 396 (21)   | 32.2 (9.8)                                       |
| Winter (weeks 47-53 and 1-8)            | 410 (22)   | 29.8 (10.6)                                      |
| <b>Latitude</b>                         |            |                                                  |
| <34°                                    | 495 (27)   | 31.5 (10.1)                                      |
| 35-39°                                  | 467 (25)   | 30.8 (10.7)                                      |
| 40-42°                                  | 539 (29)   | 31.8 (10.6)                                      |
| >42°                                    | 337 (18)   | 33.4 (10.7)                                      |
| <b>Race/Ethnicity</b>                   |            |                                                  |
| Non-Hispanic White                      | 1,589 (86) | 32.8 (10.2)                                      |
| Non-Hispanic Black                      | 134 (7)    | 21.0 (9.7)                                       |
| Hispanic                                | 82 (4)     | 28.8 (8.6)                                       |
| Other                                   | 38 (2)     | 33.2 (9.8)                                       |
| <b>Education level at baseline</b>      |            |                                                  |
| High school or less                     | 294 (16)   | 32.7 (12.1)                                      |
| Some college                            | 645 (35)   | 31.4 (10.3)                                      |
| Bachelor's degree                       | 471 (26)   | 31.4 (10.1)                                      |
| Graduate degree                         | 433 (23)   | 32.0 (10.3)                                      |
| <b>Menopausal status at baseline</b>    |            |                                                  |
| Premenopausal                           | 616 (33)   | 29.9 (10.8)                                      |
| Postmenopausal                          | 1226 (67)  | 32.7 (10.3)                                      |
| <b>Baseline body mass index</b>         |            |                                                  |
| <25.0 kg/m <sup>2</sup>                 | 705 (38)   | 35.1 (10.6)                                      |
| 25-29.9 kg/m <sup>2</sup>               | 586 (32)   | 31.6 (9.8)                                       |
| ≥30 kg/m <sup>2</sup>                   | 549 (30)   | 27.6 (9.7)                                       |
| <b>Parity</b>                           |            |                                                  |
| 0 births                                | 343 (19)   | 30.8 (10.5)                                      |
| 1 birth                                 | 277 (15)   | 30.9 (10.7)                                      |
| 2 births                                | 669 (36)   | 31.9 (10.4)                                      |
| ≥3 births                               | 553 (30)   | 32.6 (10.6)                                      |
| <b>Hormonal birth control use</b>       |            |                                                  |
| Current user                            | 75 (4)     | 36.0 (13.7)                                      |
| Former user                             | 1,495 (81) | 31.6 (10.4)                                      |
| Never user                              | 265 (14)   | 31.5 (9.9)                                       |
| <b>Hormone therapy use</b>              |            |                                                  |
| Current user                            | 192 (10)   | 33.8 (10.2)                                      |
| Former user                             | 626 (34)   | 32.7 (9.8)                                       |
| Never user                              | 1,019 (55) | 30.8 (10.9)                                      |
| <b>Physical activity (last year)</b>    |            |                                                  |
| 0 – 1 hours/week                        | 640 (35)   | 28.2 (10.3)                                      |
| 1.1 – 3 hours/week                      | 563 (31)   | 32.1 (9.6)                                       |
| >3 hours/week                           | 640 (35)   | 34.9 (10.5)                                      |
| <b>Walking</b>                          |            |                                                  |
| 0-2 hours/week                          | 426 (23)   | 30.3 (10.9)                                      |

|                                                                  |             |             |
|------------------------------------------------------------------|-------------|-------------|
| 2.1-6 hours/week                                                 | 842 (46)    | 31.8 (10.1) |
| 6.1-10 hours/week                                                | 273 (15)    | 33.0 (10.8) |
| >10 hours/week                                                   | 299 (16)    | 32.6 (10.8) |
| <b>Alcohol consumption in last year</b>                          |             |             |
| Never/Former drinker                                             | 342 (19)    | 29.8 (10.8) |
| Current drinker, <1 drink/day                                    | 1,241 (68)  | 31.6 (10.3) |
| Current drinker, $\geq$ 1 drink/day                              | 255 (14)    | 35.0 (10.4) |
| <b>Regular vitamin D supplement use (<math>\geq</math>4x/wk)</b> |             |             |
| None                                                             | 847 (47)    | 28.7 (10.5) |
| Multivitamin, no extra vitamin D                                 | 736 (41)    | 33.9 (9.4)  |
| Multivitamin and vitamin D                                       | 134 (7)     | 38.4 (10.7) |
| Vitamin D and calcium                                            | 76 (4)      | 34.7 (10.7) |
| Vitamin D, no multivitamin or calcium                            | 10 (1)      | 32.1 (7.2)  |
| <b>Regular vitamin D use</b>                                     |             |             |
| No                                                               | 847 (47)    | 28.7 (10.5) |
| Yes                                                              | 956 (53)    | 34.5 (9.8)  |
| <b>Daily vitamin D use</b>                                       |             |             |
| No                                                               | 1,044 (58)  | 29.3 (10.3) |
| Yes                                                              | 759 (42)    | 35.1 (9.8)  |
| <b>Osteoporosis</b>                                              |             |             |
| No                                                               | 1,408 (76)  | 30.8 (10.5) |
| Yes                                                              | 434 (24)    | 35.0 (10.1) |
| <b>Family history of breast cancer</b>                           |             |             |
| 1 affected sister                                                | 1,368 (74)  | 32.0 (10.6) |
| >1 first degree relative                                         | 475 (26)    | 31.2 (10.5) |
| <b>Minimum diagnosis age of affected sister</b>                  |             |             |
| 18-40                                                            | 388 (21)    | 29.8 (10.3) |
| 41-50                                                            | 719 (39)    | 31.2 (10.4) |
| 51-60                                                            | 551 (30)    | 32.5 (10.3) |
| >60                                                              | 183 (10)    | 35.4 (10.9) |
| <b>Time spent outdoors (hours/year)</b>                          |             |             |
| 0-320                                                            | 466 (25)    | 30.3 (10.9) |
| 321-530                                                          | 431 (24)    | 31.5 (9.4)  |
| 531-850                                                          | 453 (25)    | 32.2 (10.5) |
| >850                                                             | 483 (26)    | 32.9 (11.1) |
| <b>Dietary vitamin D intake (IUs)</b>                            |             |             |
| 0-75                                                             | 493 (27)    | 30.1 (11.3) |
| 76-125                                                           | 435 (24)    | 31.7 (10.3) |
| 126-200                                                          | 438 (24)    | 32.2 (10.5) |
| >200                                                             | 437 (24)    | 33.4 (9.5)  |
| <b>Prophylactic mastectomy</b>                                   |             |             |
| No                                                               | 1,834 (100) | 31.8 (10.5) |
| Yes                                                              | 9 (0)       | 31.3 (13.3) |
| <b>History of tamoxifen use</b>                                  |             |             |
| No                                                               | 1,803 (98)  | 31.7 (10.6) |
| Yes                                                              | 37 (2)      | 32.4 (9.7)  |
| <b>History of raloxifene use</b>                                 |             |             |
| No                                                               | 1,688 (92)  | 31.6 (10.6) |
| Yes                                                              | 152 (8)     | 34.0 (8.9)  |

<sup>a</sup>Total 25(OH)D values adjusted for batch only
